# Supplementary material
Source: PubMed Central journal article supplement (PMC10126940)
Supplement: jamainternmed-e230770-s001.pdf [file jamainternmed-e230770-s001.pdf]

## Supplemental Online Content

Ulyte A, Waken RJ, Epstein AM, et al. Medicare skilled nursing facility use and spending before and after introduction of the public health emergency waiver during the COVID-19 pandemic. *JAMA Intern Med*. Published online April 24, 2023. doi:10.1001/jamainternmed.2023.0770

**eAppendix 1.** Overview of SNF Reimbursement in Medicare

**eFigure 1.** Flowchart of Analyzed SNF Episodes

**eTable 1.** SNF Episode Characteristics for Patients With and Without COVID-19 During PHE in March 2020 to September 2021

**eTable 2.** Most Frequent Diagnoses in SNF Care Episodes Before and During PHE Among Long-term Care Residents and Other Beneficiaries

**eTable 3.** Number of SNF Episodes With a Qualifying Hospitalization, Other Acute Care Use, and No Acute Care Among Long-term Care Residents and Other Medicare Beneficiaries

**eTable 4.** Characteristics of SNF Episodes With and Without COVID-19 Diagnosis During PHE in March 2020 to September 2021, by Long-term Care Status and Episode Type

**eAppendix 2.** Study Results of Restricting the Analysis to a Single SNF Episode per Beneficiary per Year

**eFigure 2.** Distribution of SNFs by the Proportion of Waiver Skilled Care Episodes Among All Episodes Provided in March 2020 to September 2021

This supplemental material has been provided by the authors to give readers additional information about their work.

## **Appendix 1 . Overview of SNF Reimbursement in Medicare**

To qualify for the Medicare Part A reimbursement of SNF care, a new clinical need as well as a three-day hospitalization is normally required. SNF benefit period, which can include several SNF stays, provides a beneficiary with up to 100 days of Medicare covered SNF care. They do not have to be consecutive: breaks of up to 30 days outside SNF are allowed. If a break is between 30 and 60 days, another qualifying hospitalization is required to resume the benefit period. Once a benefit period is exhausted, the next one can only start after a 60-day break in spell-of-illness without inpatient or SNF care. Until a new benefit period is restarted with such a break, SNF stays are not covered by Medicare. Individuals who need ongoing care beyond their benefit period typically convert to “long-term care” status, which is not reimbursed by Medicare and therefore must be paid by the beneficiary directly, or through Medicaid or supplemental private coverage.

The qualifying hospitalization rule does not apply to Medicare Advantage beneficiaries and can be waived for some providers (e.g., under certain accountable care organization programs) or during a local disaster (e.g., hurricane). In addition, a shorter, two-day hospitalization is qualifying at Critical Access Hospitals.

The PHE waiver introduced two main changes for the reimbursement of SNF care: a qualifying hospitalization was no longer needed to initiate or resume a benefit period, and 60-day care gap outside the SNF was not necessary to initiate a subsequent benefit period (the latter applied only once per beneficiary).<sup>1</sup>

### **References**

1. American Health Care Association, National Center for Assisted Living. *3-Day Stay and Benefit-Period Waivers for Medicare Part A SNF PPS.*; 2021. <https://www.ahcancal.org/Survey-Regulatory-Legal/Emergency-Preparedness/Documents/COVID19/3-Day Waiver FAQ.pdf>. Accessed May 17, 2022

**eFigure 1.** Flowchart of Analyzed SNF Episodes

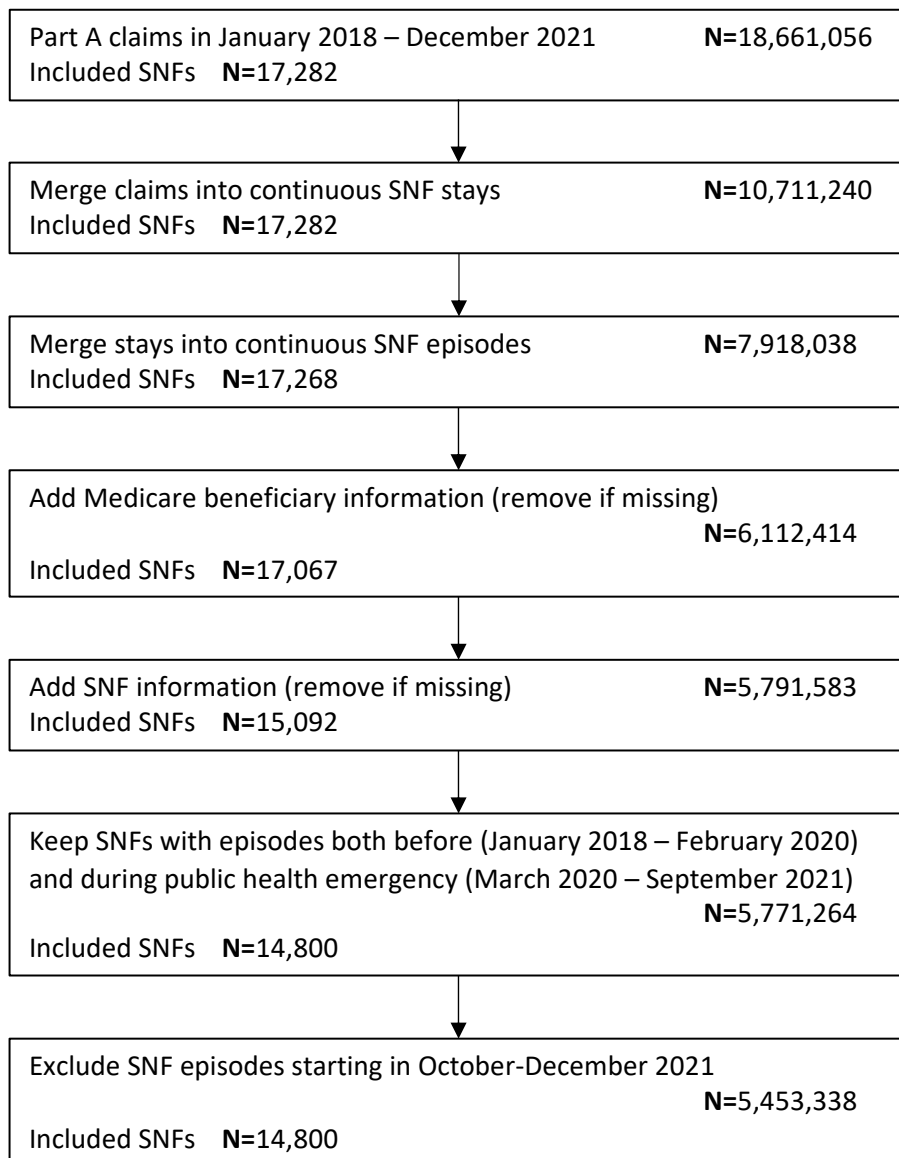

**eTable 1.** SNF Episode Characteristics for Patients With and Without COVID-19 During PHE in March 2020 to September 2021

|                                                  | <b>With COVID-19</b> | <b>Without COVID-19</b> |
|--------------------------------------------------|----------------------|-------------------------|
| <b>SNF episodes</b>                              |                      |                         |
| No. total                                        | 386785 (19%)         | 1676147 (81%)           |
| No. (%) of average monthly                       | 20357                | 88218                   |
| Standard – with qualifying hospitalization       | 8632 (42%)           | 65855 (75%)             |
| Waiver – with other acute care use               | 2363 (12%)           | 12477 (14%)             |
| Waiver – without acute care                      | 9363 (46%)           | 9886 (11%)              |
| N of skilled care days per episode (median, IQR) | 30 (15-59)           | 27 (15-48)              |
| <b>SNF episodes' beneficiaries<sup>a</sup></b>   |                      |                         |
| Age (mean, SD)                                   | 79.5 (11.4)          | 78.9 (11.0)             |
| Number of comorbidities (mean, SD)               | 8.1 (4.2)            | 7.5 (4.4)               |
| No. (%) within average monthly episodes:         |                      |                         |
| Female                                           | 12452 (61%)          | 52038 (59%)             |
| Race                                             |                      |                         |
| White                                            | 15645 (77%)          | 70886 (80%)             |
| Black                                            | 2617 (13%)           | 9524 (11%)              |
| Other                                            | 2095 (10%)           | 7808 (9%)               |
| Dual eligible for Medicaid                       | 13507 (66%)          | 34986 (40%)             |
| With dementia                                    | 9618 (47%)           | 23467 (27%)             |
| With long-term care in SNFs                      | 11913 (59%)          | 15623 (18%)             |

SNF – skilled nursing facility, PHE – public health emergency, ED – emergency department, IQR – interquartile range.

a – In case of multiple episodes per beneficiary, their characteristics are counted multiple times.

We used Pearson's chi-square test for comparing categorical variables and t-test to compare means of continuous variables. All p-values <0.001.

**eTable 2.** Most Frequent Diagnoses in SNF Care Episodes Before and During PHE Among Long-term Care Residents and Other Beneficiaries

| January 2018 - February 2020    |                                                                                           | March 2020 - September 2021                                                                |       |
|---------------------------------|-------------------------------------------------------------------------------------------|--------------------------------------------------------------------------------------------|-------|
| Diagnosis                       | N (%)                                                                                     | Diagnosis                                                                                  | N (%) |
| <b>Long-term care residents</b> |                                                                                           |                                                                                            |       |
| 1                               | Pneumonia, unspecified organism<br>19547 (4.8%)                                           | COVID-19<br>122819 (23.5%)                                                                 |       |
| 2                               | Urinary tract infection, site not specified<br>18520 (4.6%)                               | Urinary tract infection, site not specified<br>18044 (3.4%)                                |       |
| 3                               | Sepsis, unspecified organism<br>12897 (3.2%)                                              | Chronic obstructive pulmonary disease, unspecified<br>13905 (2.7%)                         |       |
| 4                               | Chronic obstructive pulmonary disease, unspecified<br>9482 (2.3%)                         | Pneumonia, unspecified organism<br>12449 (2.4%)                                            |       |
| 5                               | Muscle weakness (generalized)<br>8228 (2.0%)                                              | Unspecified dementia, unspecified severity, without behavioral disturbance<br>12152 (2.3%) |       |
| 6                               | Chronic obstructive pulmonary disease with (acute) exacerbation<br>7198 (1.8%)            | Metabolic encephalopathy<br>10487 (2.0%)                                                   |       |
| 7                               | Essential (primary) hypertension<br>7015 (1.7%)                                           | Sepsis, unspecified organism<br>10128 (1.9%)                                               |       |
| 8                               | Heart failure, unspecified<br>5657 (1.4%)                                                 | Parkinson's disease<br>9693 (1.9%)                                                         |       |
| 9                               | Unspecified dementia, unspecified severity, without behavioral disturbance<br>5560 (1.4%) | Cerebral infarction, unspecified<br>7595 (1.5%)                                            |       |
| 10                              | Metabolic encephalopathy<br>4951 (1.2%)                                                   | Alzheimer's disease, unspecified<br>7559 (1.4%)                                            |       |
| <b>Other beneficiaries</b>      |                                                                                           |                                                                                            |       |
| 1                               | Aftercare following joint replacement surgery<br>99761 (3.3%)                             | COVID-19<br>81341 (5.3%)                                                                   |       |
| 2                               | Urinary tract infection, site not specified<br>84164 (2.8%)                               | Urinary tract infection, site not specified<br>54708 (3.6%)                                |       |
| 3                               | Pneumonia, unspecified organism<br>83517 (2.8%)                                           | Aftercare following joint replacement surgery<br>49621 (3.2%)                              |       |
| 4                               | Muscle weakness (generalized)<br>70007 (2.3%)                                             | Metabolic encephalopathy<br>45087 (2.9%)                                                   |       |
| 5                               | Encounter for other orthopedic aftercare<br>55829 (1.9%)                                  | Encounter for other orthopedic aftercare<br>41053 (2.7%)                                   |       |
| 6                               | Sepsis, unspecified organism<br>48770 (1.6%)                                              | Pneumonia, unspecified organism<br>33718 (2.2%)                                            |       |
| 7                               | Encounter for other specified aftercare<br>47174 (1.6%)                                   | Sepsis, unspecified organism<br>31377 (2.0%)                                               |       |
| 8                               | Chronic obstructive pulmonary disease with (acute) exacerbation<br>42420 (1.4%)           | Acute respiratory failure with hypoxia<br>27970 (1.8%)                                     |       |
| 9                               | Cerebral infarction, unspecified<br>41947 (1.4%)                                          | Encephalopathy, unspecified<br>26407 (1.7%)                                                |       |
| 10                              | Heart failure, unspecified<br>32158 (1.1%)                                                | Cerebral infarction, unspecified<br>26143 (1.7%)                                           |       |

Highlighted are diagnoses that appear in the top 10 list only before or during the public health emergency in 2020-2021.

**eTable 3.** Number of SNF Episodes With a Qualifying Hospitalization, Other Acute Care Use, and No Acute Care Among Long-term Care Residents and Other Medicare Beneficiaries

|             | Standard –<br>qualifying hospitalization |       | Waiver –<br>with other acute care use |      | Waiver –<br>without acute care |       |
|-------------|------------------------------------------|-------|---------------------------------------|------|--------------------------------|-------|
|             | Non-LTC                                  | LTC   | Non-LTC                               | LTC  | Non-LTC                        | LTC   |
| <b>2018</b> |                                          |       |                                       |      |                                |       |
| January     | 133006                                   | 17929 | 4054                                  | 515  | 3395                           | 652   |
| February    | 112288                                   | 14395 | 3618                                  | 441  | 3118                           | 532   |
| March       | 118516                                   | 14635 | 3594                                  | 426  | 3223                           | 566   |
| April       | 108726                                   | 13966 | 3447                                  | 399  | 3179                           | 565   |
| May         | 109832                                   | 14032 | 3537                                  | 409  | 3273                           | 528   |
| June        | 106466                                   | 13509 | 3474                                  | 401  | 3380                           | 576   |
| July        | 105845                                   | 13835 | 3323                                  | 418  | 3100                           | 566   |
| August      | 110112                                   | 14449 | 3686                                  | 417  | 3604                           | 576   |
| September   | 99895                                    | 13367 | 3153                                  | 423  | 3102                           | 544   |
| October     | 112185                                   | 14689 | 3517                                  | 396  | 3184                           | 570   |
| November    | 107452                                   | 13960 | 3611                                  | 355  | 3073                           | 559   |
| December    | 106334                                   | 14312 | 3481                                  | 399  | 2895                           | 525   |
| <b>2019</b> |                                          |       |                                       |      |                                |       |
| January     | 118206                                   | 15930 | 4205                                  | 398  | 3070                           | 623   |
| February    | 105267                                   | 14222 | 3669                                  | 325  | 2815                           | 612   |
| March       | 112564                                   | 15197 | 3845                                  | 360  | 3109                           | 621   |
| April       | 108424                                   | 14692 | 3747                                  | 386  | 3082                           | 593   |
| May         | 108419                                   | 14461 | 3888                                  | 390  | 3101                           | 613   |
| June        | 99045                                    | 13568 | 3568                                  | 380  | 2917                           | 559   |
| July        | 104533                                   | 14523 | 3847                                  | 441  | 2969                           | 687   |
| August      | 103750                                   | 14180 | 3828                                  | 393  | 3216                           | 607   |
| September   | 96465                                    | 13348 | 3635                                  | 373  | 2961                           | 583   |
| October     | 106455                                   | 15010 | 4174                                  | 411  | 3117                           | 731   |
| November    | 99116                                    | 14087 | 3859                                  | 385  | 2837                           | 548   |
| December    | 103695                                   | 14899 | 4180                                  | 416  | 2761                           | 580   |
| <b>2020</b> |                                          |       |                                       |      |                                |       |
| January     | 112243                                   | 16148 | 2949                                  | 519  | 5038                           | 721   |
| February    | 98712                                    | 14469 | 2746                                  | 458  | 4717                           | 701   |
| March       | 78462                                    | 13791 | 6857                                  | 3273 | 4617                           | 7570  |
| April       | 43699                                    | 12275 | 7675                                  | 6040 | 4644                           | 29715 |
| May         | 49737                                    | 12921 | 8755                                  | 4588 | 4339                           | 20706 |
| June        | 59933                                    | 11201 | 9930                                  | 3653 | 4660                           | 11613 |
| July        | 62296                                    | 11601 | 10419                                 | 4297 | 4921                           | 17663 |
| August      | 60941                                    | 11335 | 10530                                 | 3591 | 4836                           | 13314 |
| September   | 63986                                    | 10698 | 10825                                 | 3460 | 5169                           | 11780 |
| October     | 66180                                    | 11303 | 11666                                 | 4018 | 5517                           | 17064 |
| November    | 58813                                    | 10679 | 10475                                 | 5050 | 5645                           | 30546 |
| December    | 66412                                    | 11906 | 11805                                 | 5661 | 7021                           | 36996 |
| <b>2021</b> |                                          |       |                                       |      |                                |       |
| January     | 65965                                    | 10288 | 11693                                 | 3452 | 7003                           | 20414 |
| February    | 61587                                    | 8089  | 11800                                 | 1961 | 5672                           | 4615  |

|           |       |      |       |      |      |      |
|-----------|-------|------|-------|------|------|------|
| March     | 69720 | 8978 | 13848 | 2254 | 6738 | 3774 |
| April     | 67985 | 8963 | 13718 | 2247 | 6504 | 3954 |
| May       | 66048 | 9138 | 13480 | 2099 | 6173 | 3252 |
| June      | 71220 | 9758 | 13964 | 2116 | 6582 | 2861 |
| July      | 70942 | 9947 | 13332 | 2384 | 6417 | 4561 |
| August    | 65791 | 9682 | 12834 | 2822 | 6649 | 8201 |
| September | 63637 | 9346 | 12764 | 2628 | 6905 | 7104 |

---

Non-LTC – Medicare beneficiaries not in long-term care at a nursing home; LTC – long-term care residents. Red line in the Table separates the time periods before and during the public health emergency.

**eTable 4.** Characteristics of SNF Episodes With and Without COVID-19 Diagnosis During PHE in March 2020 to September 2021, by Long-term Care Status and Episode Type

|                                                                         | Without COVID-19 diagnosis                 |                                    |                             | With COVID-19 diagnosis                    |                                    |                             |
|-------------------------------------------------------------------------|--------------------------------------------|------------------------------------|-----------------------------|--------------------------------------------|------------------------------------|-----------------------------|
|                                                                         | Standard – with qualifying hospitalization | Waiver – with other acute care use | Waiver – without acute care | Standard – with qualifying hospitalization | Waiver – with other acute care use | Waiver – without acute care |
| <b>Episodes among long-term care residents (N=523,196)</b>              |                                            |                                    |                             |                                            |                                    |                             |
| No. (%) of episodes                                                     | 159906 (31%)                               | 40847 (8%)                         | 96092 (18%)                 | 41993 (8%)                                 | 24747 (5%)                         | 159611 (31%)                |
| No. of skilled care days (median, IQR)                                  | 35 (19-67)                                 | 40 (21-76)                         | 30 (14-61)                  | 42 (21-78)                                 | 51 (26-87)                         | 24 (14-47)                  |
| Beneficiary age (mean, SD)                                              | 76.5 (12.2)                                | 77.9 (12.0)                        | 78.9 (11.9)                 | 76.6 (11.6)                                | 78.2 (11.6)                        | 80.2 (11.9)                 |
| Beneficiary race/ethnicity No. (%)                                      |                                            |                                    |                             |                                            |                                    |                             |
| White                                                                   | 115154 (72%)                               | 29776 (73%)                        | 64398 (67%)                 | 28354 (68%)                                | 17924 (72%)                        | 125598 (79%)                |
| Black                                                                   | 27851 (17%)                                | 6289 (15%)                         | 15822 (16%)                 | 8616 (21%)                                 | 3953 (16%)                         | 18903 (12%)                 |
| Other                                                                   | 16901 (11%)                                | 4782 (12%)                         | 15872 (17%)                 | 5023 (12%)                                 | 2870 (12%)                         | 15110 (9%)                  |
| No. (%) for dual eligible patients                                      | 139246 (87%)                               | 36130 (88%)                        | 87509 (91%)                 | 38195 (91%)                                | 22489 (91%)                        | 141418 (89%)                |
| No. (%) for patients with dementia <sup>a</sup>                         | 89124 (56%)                                | 23817 (58%)                        | 56854 (59%)                 | 24850 (59%)                                | 15150 (61%)                        | 101196 (63%)                |
| No. of comorbidities (mean, SD) <sup>a</sup>                            | 10.0 (4.2)                                 | 9.7 (4.2)                          | 8.5 (4.4)                   | 9.9 (4.1)                                  | 9.5 (4.2)                          | 8.4 (3.9)                   |
| 90-day mortality (%)                                                    | 29008 (18%)                                | 4852 (12%)                         | 10143 (11%)                 | 7266 (17%)                                 | 3087 (12%)                         | 22988 (14%)                 |
| <b>Episodes among beneficiaries not in long-term care (N=1,539,736)</b> |                                            |                                    |                             |                                            |                                    |                             |
| No. (%) of episodes                                                     | 1091344 (71%)                              | 196225 (13%)                       | 91733 (6%)                  | 122010 (8%)                                | 20145 (1%)                         | 18279 (1%)                  |
| No. of skilled care days (median, IQR)                                  | 25 (15-44)                                 | 25 (15-44)                         | 25 (14-48)                  | 33 (17-62)                                 | 37 (18-68)                         | 20 (12-43)                  |
| Beneficiary age (mean, SD)                                              | 79.0 (10.8)                                | 81.2 (10.3)                        | 77.5 (10.5)                 | 79.2 (10.6)                                | 81.2 (10.5)                        | 81.3 (10.8)                 |
| Beneficiary race/ethnicity No. (%)                                      |                                            |                                    |                             |                                            |                                    |                             |
| White                                                                   | 903057 (83%)                               | 168132 (86%)                       | 66324 (72%)                 | 94550 (77%)                                | 16486 (82%)                        | 14338 (78%)                 |
| Black                                                                   | 102125 (9%)                                | 14378 (7%)                         | 14486 (16%)                 | 14468 (12%)                                | 1786 (9%)                          | 1995 (11%)                  |
| Other                                                                   | 86162 (8%)                                 | 13715 (7%)                         | 10923 (12%)                 | 12992 (11%)                                | 1873 (9%)                          | 1946 (11%)                  |
| No. (%) for dual eligible patients                                      | 308911 (28%)                               | 55135 (28%)                        | 37805 (41%)                 | 40585 (33%)                                | 7177 (36%)                         | 6773 (37%)                  |
| No. (%) for patients with dementia <sup>a</sup>                         | 218548 (20%)                               | 45402 (23%)                        | 12132 (13%)                 | 29250 (24%)                                | 6124 (30%)                         | 6168 (34%)                  |
| No. of comorbidities (mean, SD) <sup>a</sup>                            | 7.3 (4.2)                                  | 7.1 (4.1)                          | 3.8 (4.4)                   | 7.4 (4.2)                                  | 6.9 (4.3)                          | 5.1 (4.5)                   |
| 90-day mortality (%)                                                    | 190376 (17%)                               | 21082 (11%)                        | 13266 (14%)                 | 20240 (17%)                                | 2997 (15%)                         | 3076 (17%)                  |

We used Pearson’s chi-square test for comparing categorical variables and t-test to compare means of continuous variables. P-values for all comparisons were <0.001.

SNF – skilled nursing facility, PHE – public health emergency, IQR – interquartile range, SD – standard deviation.



**eAppendix 2.** Study Results of Restricting the Analysis to a Single SNF Episode per Beneficiary per Year

Number of SNF episodes with a qualifying hospitalization, other preceding acute care use, and no prior acute care

A, B, C – episodes for residents in long-term care; D, E, F – episodes for other beneficiaries.

A, D – all episodes. B, E – episodes with COVID-19. C, F – episodes without COVID-19.

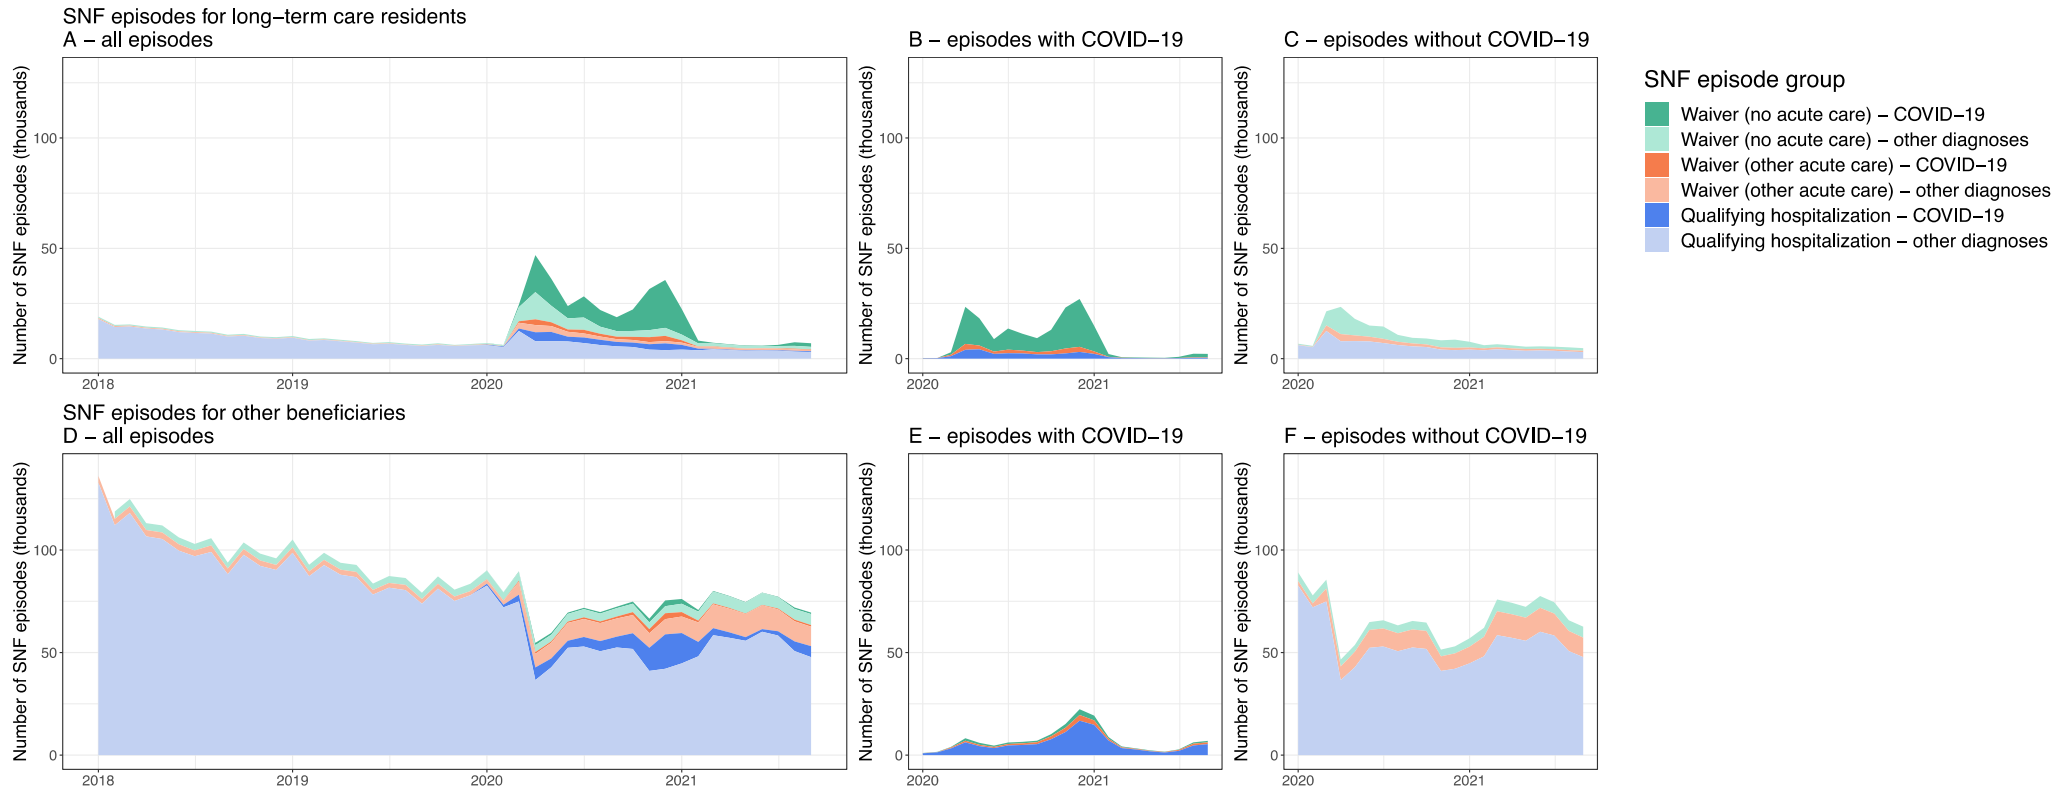

## SNF Episode Characteristics Before and During PHE

|                                            | January 2018 –<br>February 2020 | March 2020 –<br>September 2021 |
|--------------------------------------------|---------------------------------|--------------------------------|
| <b>SNF episodes</b>                        |                                 |                                |
| Total N                                    | 2820399                         | 1748059                        |
| Average monthly N                          | 108477                          | 92003                          |
| Standard – with qualifying hospitalization | 101614 (94%)                    | 64304 (70%)                    |
| Waiver – with other acute care use         | 2918 (3%)                       | 12341 (13%)                    |
| Waiver – without acute care                | 3944 (4%)                       | 15359 (17%)                    |
| N of skilled care days (median, IQR)       | 25 (14-45)                      | 27 (15-49)                     |
| <b>SNF episodes' beneficiaries</b>         |                                 |                                |
| Age (mean, SD)                             | 79.0 (11.0)                     | 79.2 (11.0)                    |
| N of CCW comorbidities (mean, SD)          | 7.0 (4.1)                       | 7.2 (4.3)                      |
| Within average monthly episodes:           |                                 |                                |
| N (%) female                               | 64325 (59%)                     | 54561 (59%)                    |
| N (%) race                                 |                                 |                                |
| White                                      | 87738 (81%)                     | 73685 (80%)                    |
| Black                                      | 11397 (11%)                     | 10036 (11%)                    |
| Other                                      | 9342 (9%)                       | 8282 (9%)                      |
| N (%) dual eligible for Medicaid           | 36640 (34%)                     | 38430 (42%)                    |
| N (%) with dementia                        | 23310 (21%)                     | 25515 (28%)                    |
| N (%) with long-term care in SNFs          | 10163 (9%)                      | 19313 (21%)                    |

SNF – skilled nursing facility, PHE – public health emergency, ED – emergency department, IQR – interquartile range, CCW – Chronic Conditions Data Warehouse.

Characteristics of Standard and Waiver SNF Episodes During PHE in March 2020 to September 2021, by Long-term Care Status

|                                                                         | Standard –<br>with qualifying<br>hospitalization | Waiver –<br>with other acute<br>care use | Waiver –<br>without acute care |
|-------------------------------------------------------------------------|--------------------------------------------------|------------------------------------------|--------------------------------|
| <b>Episodes among long-term care residents (N=366,942)</b>              |                                                  |                                          |                                |
| N of episodes (%)                                                       | 132165 (36%)                                     | 43879 (12%)                              | 190898 (52%)                   |
| N of skilled care days (median, IQR)                                    | 37 (19-71)                                       | 46 (23-83)                               | 27 (14-52)                     |
| Beneficiary age (mean, SD)                                              | 76.8 (12.1)                                      | 78.2 (11.9)                              | 79.9 (12)                      |
| Beneficiary race/ethnicity (%)                                          |                                                  |                                          |                                |
| White                                                                   | 93954 (71%)                                      | 31848 (73%)                              | 142985 (75%)                   |
| Black                                                                   | 24199 (18%)                                      | 7023 (16%)                               | 26017 (14%)                    |
| Other                                                                   | 14012 (11%)                                      | 5008 (11%)                               | 21896 (11%)                    |
| N (%) for dual eligible patients                                        | 115721 (88%)                                     | 39296 (90%)                              | 171163 (90%)                   |
| N (%) with COVID-19 diagnosis                                           | 30608 (23%)                                      | 18137 (41%)                              | 126625 (66%)                   |
| N (%) for patients with dementia                                        | 74259 (56%)                                      | 26228 (60%)                              | 119523 (63%)                   |
| N of CCW comorbidities (mean, SD)                                       | 9.6 (4.3)                                        | 9.3 (4.3)                                | 8.3 (4.1)                      |
| 90-day mortality (%)                                                    | 25090 (19%)                                      | 5676 (13%)                               | 27242 (14%)                    |
| <b>Episodes among beneficiaries not in long-term care (N=1,381,117)</b> |                                                  |                                          |                                |
| N of episodes (%)                                                       | 1089610 (79%)                                    | 190592 (14%)                             | 100915 (7%)                    |
| N of skilled care days (median, IQR)                                    | 26 (15-46)                                       | 25 (15-46)                               | 24 (14-47)                     |
| Beneficiary age (mean, SD)                                              | 79.1 (10.8)                                      | 81.2 (10.4)                              | 78 (10.7)                      |
| Beneficiary race/ethnicity (%)                                          |                                                  |                                          |                                |
| White                                                                   | 895351 (82%)                                     | 162450 (85%)                             | 73424 (73%)                    |
| Black                                                                   | 103926 (10%)                                     | 14149 (7%)                               | 15372 (15%)                    |
| Other                                                                   | 90333 (8%)                                       | 13993 (7%)                               | 12119 (12%)                    |
| N (%) for dual eligible patients                                        | 308680 (28%)                                     | 54160 (28%)                              | 41153 (41%)                    |
| N (%) with COVID-19 diagnosis                                           | 110722 (10%)                                     | 17950 (9%)                               | 16556 (16%)                    |
| N (%) for patients with dementia                                        | 207169 (19%)                                     | 42249 (22%)                              | 15352 (15%)                    |
| N of CCW comorbidities (mean, SD)                                       | 7 (4.1)                                          | 6.7 (4)                                  | 3.7 (4.3)                      |
| 90-day mortality (%)                                                    | 190429 (17%)                                     | 21568 (11%)                              | 15136 (15%)                    |

SNF – skilled nursing facility, PHE – public health emergency, IQR – interquartile range, SD – standard deviation, CCW – Chronic Conditions Data Warehouse.

**eFigure 2.** Distribution of SNFs by the Proportion of Waiver Skilled Care Episodes Among All Episodes Provided in March 2020 to September 2021

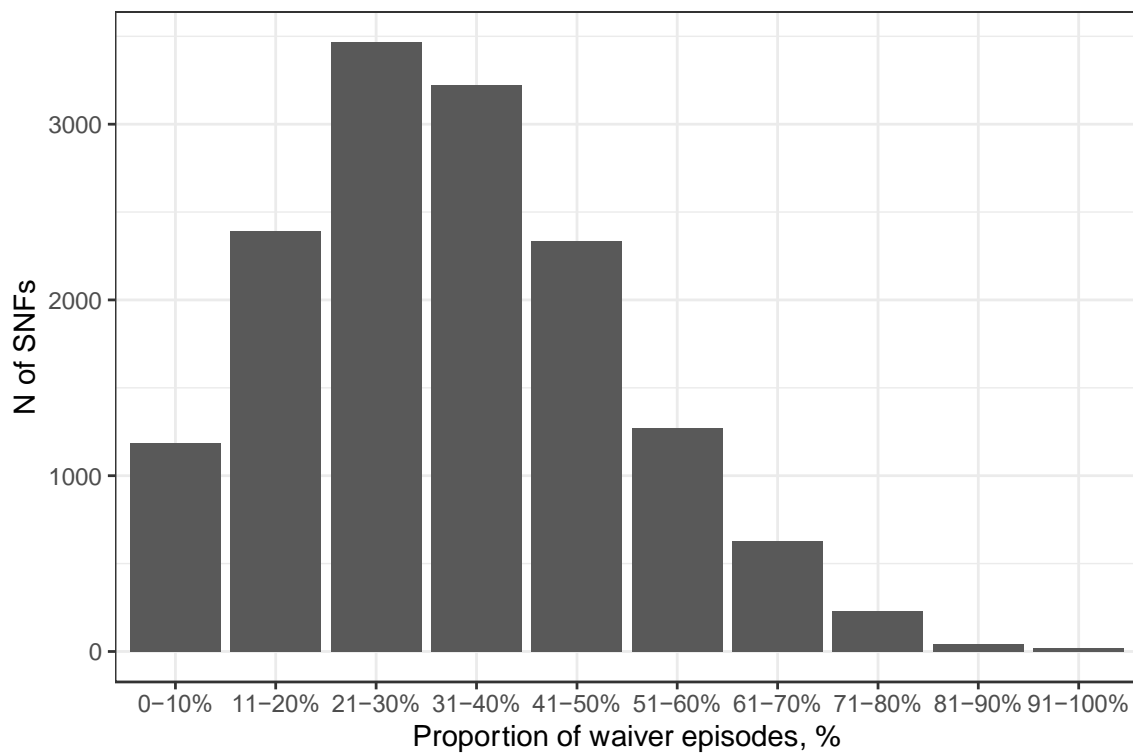

SNF – skilled nursing facility.
