# Supplementary material
Source: PubMed Central journal article supplement (PMC10126940)
Supplement: jamainternmed-e230770-s002.pdf [file jamainternmed-e230770-s002.pdf]

## Data Sharing Statement

Ulyte. Medicare Skilled Nursing Facility Use and Spending Before and After Introduction of the Public Health Emergency Waiver During the COVID-19 Pandemic. *JAMA Intern Med.* Published April 24, 2023. doi:10.1001/jamainternmed.2023.0770

### Data

**Data available:** No

### Additional Information

**Explanation for why data not available:** We rely on Medicare claims data that is restricted by a data use agreement.
